# Supplementary material for: TREM2 improves neurological dysfunction and attenuates neuroinflammation, TLR signaling and neuronal apoptosis in the acute phase of intracerebral hemorrhage
Source: Front Aging Neurosci. 2022 Oct 24;14:967825. doi: 10.3389/fnagi.2022.967825 (PMC9637852; doi:10.3389/fnagi.2022.967825)
Supplement: Supplementary file 9 [file Table_1.XLSX]

## Sheet: Sheet1
	Western Blot-TREM2 timepoint									TUNEL-positive cells(%)
	Sham	6h	12h	24h	3d	7d	14d		Sham	TREM2-Con	TREM2	TAK242-Con	TAK242
TREM2/β-tubulin	0.27116	0.322945	0.804656	1.19108	1.15822	0.500855	0.401919		0.008729	0.884115	0.032322	0.784258	0.275017
TREM2/β-tubulin	0.433225	0.555187	0.826352	1.34698	1.14378	0.720269	0.990208		0.008745	0.854415	0.043122	0.804121	0.192816
TREM2/β-tubulin	0.666353	0.603676	1.02756	1.40193	1.46683	1.21768	1.03662		0.012729	0.88315	0.121512	0.77566	0.285094
	Western Blot-TLR4
	Sham	TREM2-Con	TREM2	TAK242-Con	TAK242
TLR4/β-tubulin	0.067081	0.630063	0.18779	0.74141	0.222995
TLR4/β-tubulin	0.331712	0.941984	0.431836	0.982726	0.157667
TLR4/β-tubulin	0.196926	0.911089	0.328554	0.98837	0.208744
TLR4/β-tubulin	0.645166	1.11585	0.830745	0.98509	0.718461
TLR4/β-tubulin	0.704815	1.14952	0.791866	0.989125	0.690218				Immunochemical staining:TLR4 intensity
TLR4/β-tubulin	0.319378	1.10225	0.360529	0.825839	0.418667			Control			ICH			ICH+TAK242
	Western Blot-CD206						BV2	2.2623	12.1636	1.06	77.2415	134.402	127.448	27.0331	12.7	18.1019
	Sham	TREM2-Con	TREM2	TAK242-Con	TAK242		BV2-LV-TREM2	1.2411	6.37	4.4953	33.7489	53.3108	33.7489	27.0331	30.6879	27.0331
CD206/β-tubulin	1.15376	0.655071	1.02618	0.551271	0.745974
CD206/β-tubulin	0.928902	0.599214	0.749635	0.419541	0.660011
CD206/β-tubulin	0.951748	0.554217	0.78199	0.536856	0.854468
CD206/β-tubulin	0.812405	0.449378	0.846549	0.41654	0.812896
CD206/β-tubulin	0.895324	0.553627	0.83526	0.453243	0.847853
CD206/β-tubulin	1.1262	0.534709	0.999054	0.564645	0.892266				Immunochemical staining:TREM2 intensity
	Western Blot-iNOS							Control			ICH			ICH+TAK242
	Sham	TREM2-Con	TREM2	TAK242-Con	TAK242		BV2	8.1717	7.6767	8.398	21.1578	19.0011	20.3559	33.2443	25.2676	28.3351
iNOS/β-tubulin	0.573496	0.99749	0.523594	1.16511	0.792146		BV2-LV-TREM2	50.3779	43.048	63.8213	41.5481	44.4623	62.6093	30.8303	40.9429	57.5822
iNOS/β-tubulin	0.618067	0.874695	0.542656	1.03551	0.65879
iNOS/β-tubulin	0.368876	0.814937	0.219803	0.877142	0.453877
iNOS/β-tubulin	0.644202	0.977151	0.487955	1.07596	0.646407
iNOS/β-tubulin	0.616595	0.934107	0.592959	1.11896	0.683623
iNOS/β-tubulin	0.572021	0.974149	0.56407	1.01294	0.567468						Brain Edema
	Western Blot-p-NF-κB/NF-κB							Sham			AAV-con			AAV-TREM2
	Sham	TREM2-Con	TREM2	TAK242-Con	TAK242		ipsilateral	0.777778	0.784705	0.779521	0.821403	0.804614	0.808131	0.77212	0.788223	0.787977
p-NF-κB/NF-κB	0.452657	0.722514	0.541011	0.925291	0.384477		contralateral	0.774274	0.780428	0.780968	0.787284	0.799062	0.796139	0.771501	0.778682	0.786413
p-NF-κB/NF-κB	0.440826	0.68826	0.520229	0.916519	0.399669
p-NF-κB/NF-κB	0.469782	0.808543	0.463026	0.779334	0.390917
p-NF-κB/NF-κB	0.406691	0.684747	0.364169	0.800529	0.300693
p-NF-κB/NF-κB	0.369887	0.640048	0.365368	0.698632	0.333816					Corner Turn Test
p-NF-κB/NF-κB	0.228433	0.614763	0.440433	0.755135	0.343975				Sham	AAV-NC	AAV-TREM2	TAK242-NC	TAK242
	Western Blot-p-p38/p38								50	10	40	20	30
	Sham	TREM2-Con	TREM2	TAK242-Con	TAK242				50	20	30	10	40
p-p38/p38	0.392472	1.13234	0.554243	1.08138	0.224499				40	0	50	0	50
p-p38/p38	0.242087	0.930636	0.376662	0.932202	0.127246				60	10	40	0	50
p-p38/p38	0.322553	1.10568	0.369438	0.943969	0.169601				40	20	50	20	40
p-p38/p38	0.285676	1.0204	0.407834	0.985372	0.258923				30	10	40	10	40
p-p38/p38	0.173892	0.926321	0.317348	0.898873	0.220456
p-p38/p38	0.287683	0.604141	0.195852	0.692457	0.314614					Bederson Score
	Western Blot-p-ERK/ERK								Sham	AAV-NC	AAV-TREM2	TAK242-NC	TAK242
	Sham	TREM2-Con	TREM2	TAK242-Con	TAK242				0	3	0	3	1
p-ERK/ERK	0.19801	0.428825	0.301952	0.430766	0.184169				0	2	1	2	0
p-ERK/ERK	0.177109	0.433191	0.259426	0.420835	0.164707				0	3	1	3	1
p-ERK/ERK	0.255307	0.544198	0.267987	0.563379	0.187855				0	3	0	3	1
p-ERK/ERK	0.208006	0.450508	0.238792	0.568285	0.156995				0	3	0	2	1
p-ERK/ERK	0.262838	0.506597	0.244487	0.669962	0.213807				0	2	1	3	1
p-ERK/ERK	0.306503	0.930903	0.446824	0.773974	0.268793
	Western Blot-TNF-α									Forelimb Placement Test
	Sham	TREM2-Con	TREM2	TAK242-Con	TAK242				Sham	AAV-NC	AAV-TREM2	TAK242-NC	TAK242
TNF-α/β-tubulin	0.19206	0.616607	0.241418	0.849918	0.350671				90	20	90	0	80
TNF-α/β-tubulin	0.197044	0.584753	0.234623	0.909154	0.357914				90	20	80	10	60
TNF-α/β-tubulin	0.113825	0.514299	0.10242	0.784135	0.331754				100	30	80	20	90
TNF-α/β-tubulin	0.169923	0.467585	0.188122	0.452948	0.235915				90	10	70	0	80
TNF-α/β-tubulin	0.318525	0.553339	0.27663	0.609821	0.296614				80	0	90	30	70
TNF-α/β-tubulin	0.297369	0.601158	0.240849	0.718767	0.337123				100	30	90	20	80
	Western Blot-IL-1β
	Sham	TREM2-Con	TREM2	TAK242-Con	TAK242
IL-1β/β-tubulin	0.192119	0.973637	0.487832	1.16661	0.418355
IL-1β/β-tubulin	0.247667	1.00574	0.390237	1.12245	0.59985
IL-1β/β-tubulin	0.370569	1.17056	0.568455	1.1583	0.46853
IL-1β/β-tubulin	0.146882	0.845799	0.444527	1.25282	0.459023
IL-1β/β-tubulin	0.22173	1.03677	0.423889	0.927009	0.46593
IL-1β/β-tubulin	0.183556	1.00436	0.27593	0.887629	0.337957
	Western Blot-bax
	Sham	TREM2-Con	TREM2	TAK242-Con	TAK242
bax/β-tubulin	0.547189	0.98458	0.723483	1.02006	0.562898
bax/β-tubulin	0.970172	1.34548	0.629212	1.13533	0.63462
bax/β-tubulin	0.660751	1.34862	0.818878	1.21074	0.600893
bax/β-tubulin	0.512446	1.20119	0.628719	1.42278	0.588944
bax/β-tubulin	0.453928	1.38528	0.664354	1.03783	0.571761
bax/β-tubulin	0.516878	1.24024	0.504273	0.974359	0.477794
	Western Blot-bcl2
	Sham	TREM2-Con	TREM2	TAK242-Con	TAK242
bcl2/β-tubulin	0.795089	0.546397	0.805623	0.463608	0.795655
bcl2/β-tubulin	0.829503	0.528463	0.813368	0.428597	0.783281
bcl2/β-tubulin	1.06217	0.449549	0.739905	0.299944	0.587179
bcl2/β-tubulin	0.720383	0.448218	0.845903	0.48548	0.818754
bcl2/β-tubulin	0.70863	0.470084	0.897344	0.49454	0.905612
bcl2/β-tubulin	0.843997	0.389164	0.887136	0.375433	0.895047
	Western blot: TREM2 (BV2-Oxygen induction)
	NC	3h	6h	12h
TREM2/β-tubulin	1.14501	1.17589	1.8229	4.60283
TREM2/β-tubulin	0.759686	1.28638	1.56863	2.544
TREM2/β-tubulin	0.845014	0.789133	1.10845	1.99987
	Western blot: TREM2 (AAV-TREM2 transfection)
	AAV-NC	AAV-TREM2
TREM2/β-tubulin	0.558905	1.15203
TREM2/β-tubulin	0.697966	1.26265
TREM2/β-tubulin	0.529938	1.29459
	Western blot: TREM2 (BV2-LV-TREM2 transfection)
	LV-NC	LV-TREM2
TREM2/β-tubulin	0.121684	0.89505
TREM2/β-tubulin	0.167606	0.925134
TREM2/β-tubulin	0.347206	1.01728
	Western blot:TNF-α
	ICH	AAV-NC	TAK242-NC
TNF-α/β-tubulin	0.859621	0.739867	0.93123
TNF-α/β-tubulin	0.916534	0.738847	0.878983
TNF-α/β-tubulin	0.851625	0.73592	0.943112
	Western blot:IL-1β
	ICH	AAV-NC	TAK242-NC
IL-1β/β-tubulin	1.20723	1.05546	1.20399
IL-1β/β-tubulin	1.24166	1.12344	1.19314
IL-1β/β-tubulin	1.24465	1.15067	1.21093
	Western blot:TLR4
	ICH	AAV-NC	TAK242-NC
TLR4/β-tubulin	1.18239	1.01554	1.02293
TLR4/β-tubulin	1.15756	1.01983	1.0736
TLR4/β-tubulin	1.1832	1.0616	1.16224
